# Supplementary material for: Identification of the key ferroptosis-related genes involved in sepsis progression and experimental validation in vivo
Source: PubMed Central journal article supplement (PMC9524243; doi:10.3389/fphar.2022.940261), 2022-08-11
Supplement: Image1.pdf [file Image1.pdf]

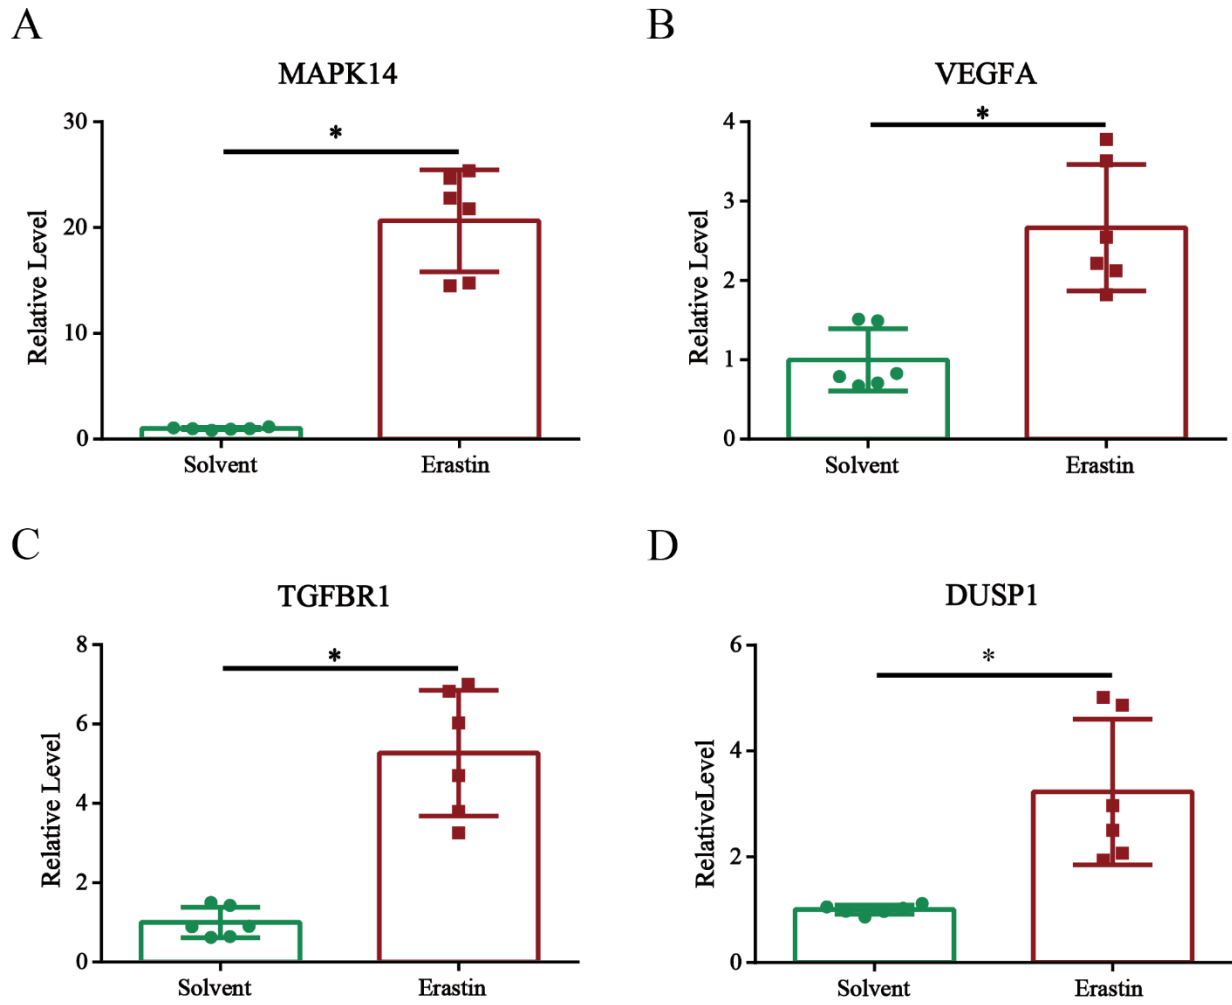

**Supplementary Figure 1.** qRT-PCR shows that the expression of (A) MAPK14, (B) VEGFA, (C) DUSP1, and (D) TGFBR1 was higher in the Erastin group than in the Solvent group.
